# Supplementary material for: Photocatalytic mineralization of chlorpyrifos using CdS/MAX-phase nanocomposites and detailed investigation of the mechanism and degradation pathways
Source: Royal Society of Chemistry journal article supplement (doi:10.1039/d4nj03989k), 2024-01-01
Supplement: d4nj03989k1.pdf [file d4nj03989k1.pdf]

## Supplementary information

### Photocatalytic Mineralization of Chlorpyrifos Using CdS/MAX-Phase Nanocomposites and Detailed Investigation on the Mechanism and Degradation Pathways

Jinal Patel<sup>1</sup>, Rama Gaur<sup>1\*</sup>, Syed Shahabuddin<sup>\*1</sup>, Inderjeet Tyagi<sup>2</sup>

Figures: -

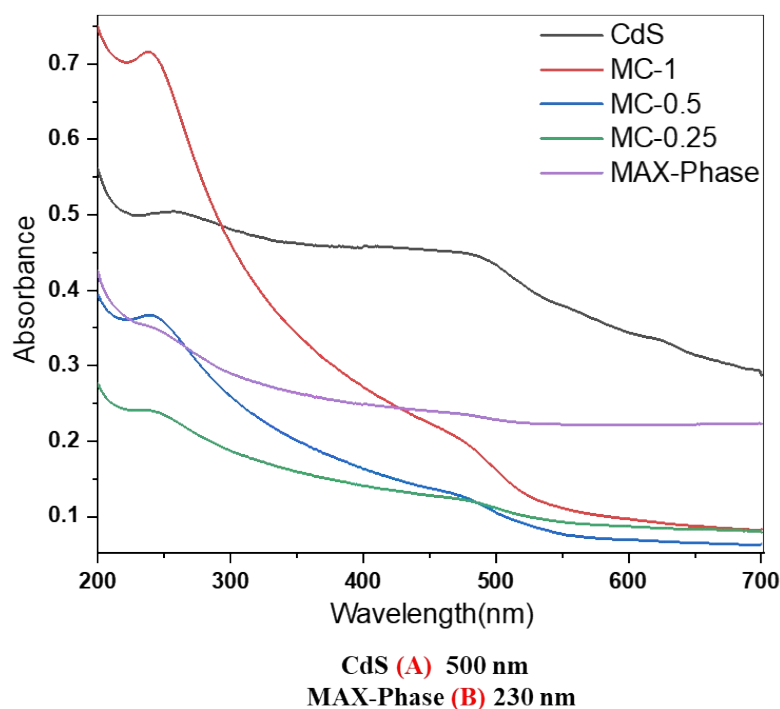

Figure S1: - UV-Vis spectrum of all catalysts in water (without CPY)

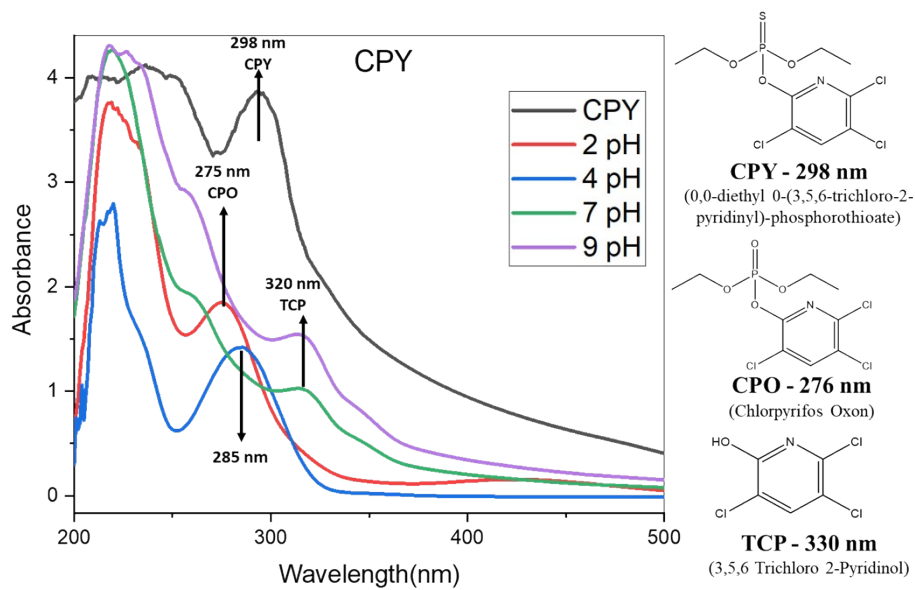

Figure S2: - UV-Vis spectrum of CPY at different pH conditions

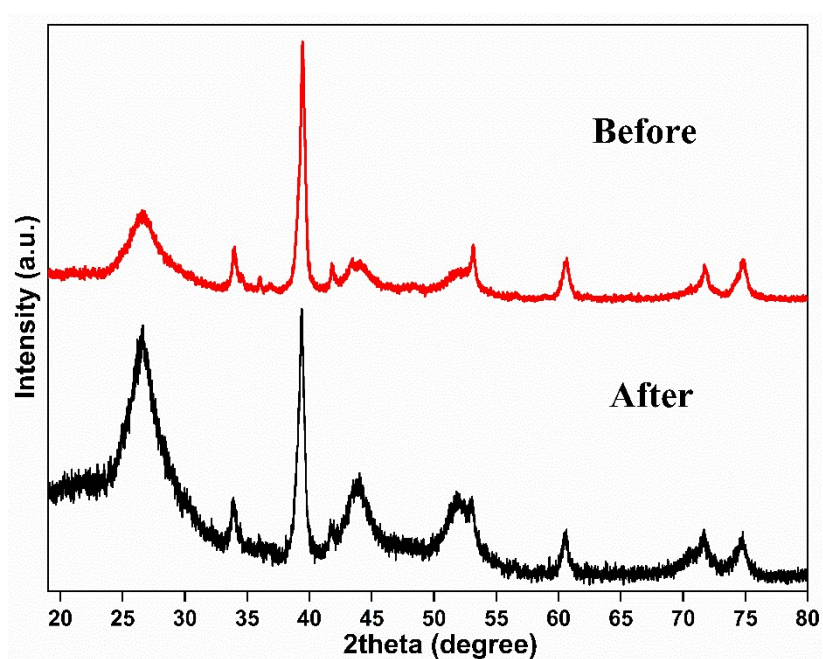

Figure S3: -XRD spectra of fresh and treated photocatalyst

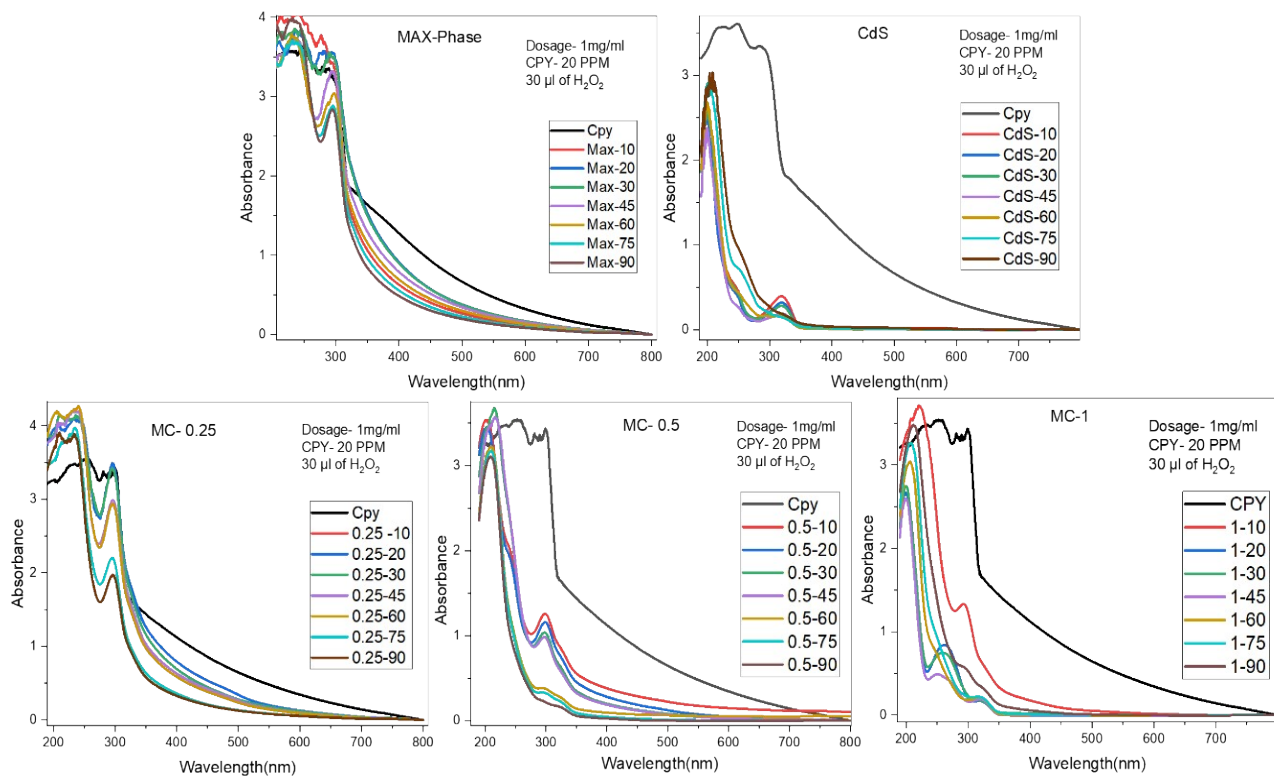

Figure S4: - Kinetic studies CPY using CdS, MAX-Phase and its nanocomposites

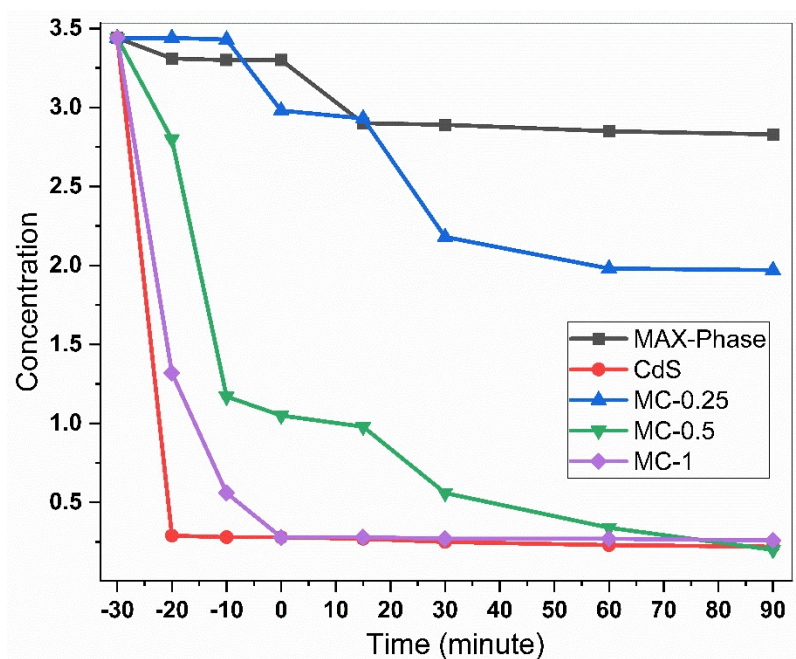

Figure S5: - Concentration vs time graph of CdS, MAX-Phase, and its nanocomposites
